# Supplementary material for: Expression of Lineage Transcription Factors Identifies Differences in Transition States of Induced Human Oligodendrocyte Differentiation
Source: MDPI journal article supplement (doi:10.3390/cells11020241), 2022-01-11
Supplement: s1 [file s1]

## Inventory of Supplemental Information

- Supplemental Figures
- Supplemental Tables
- Supplemental References

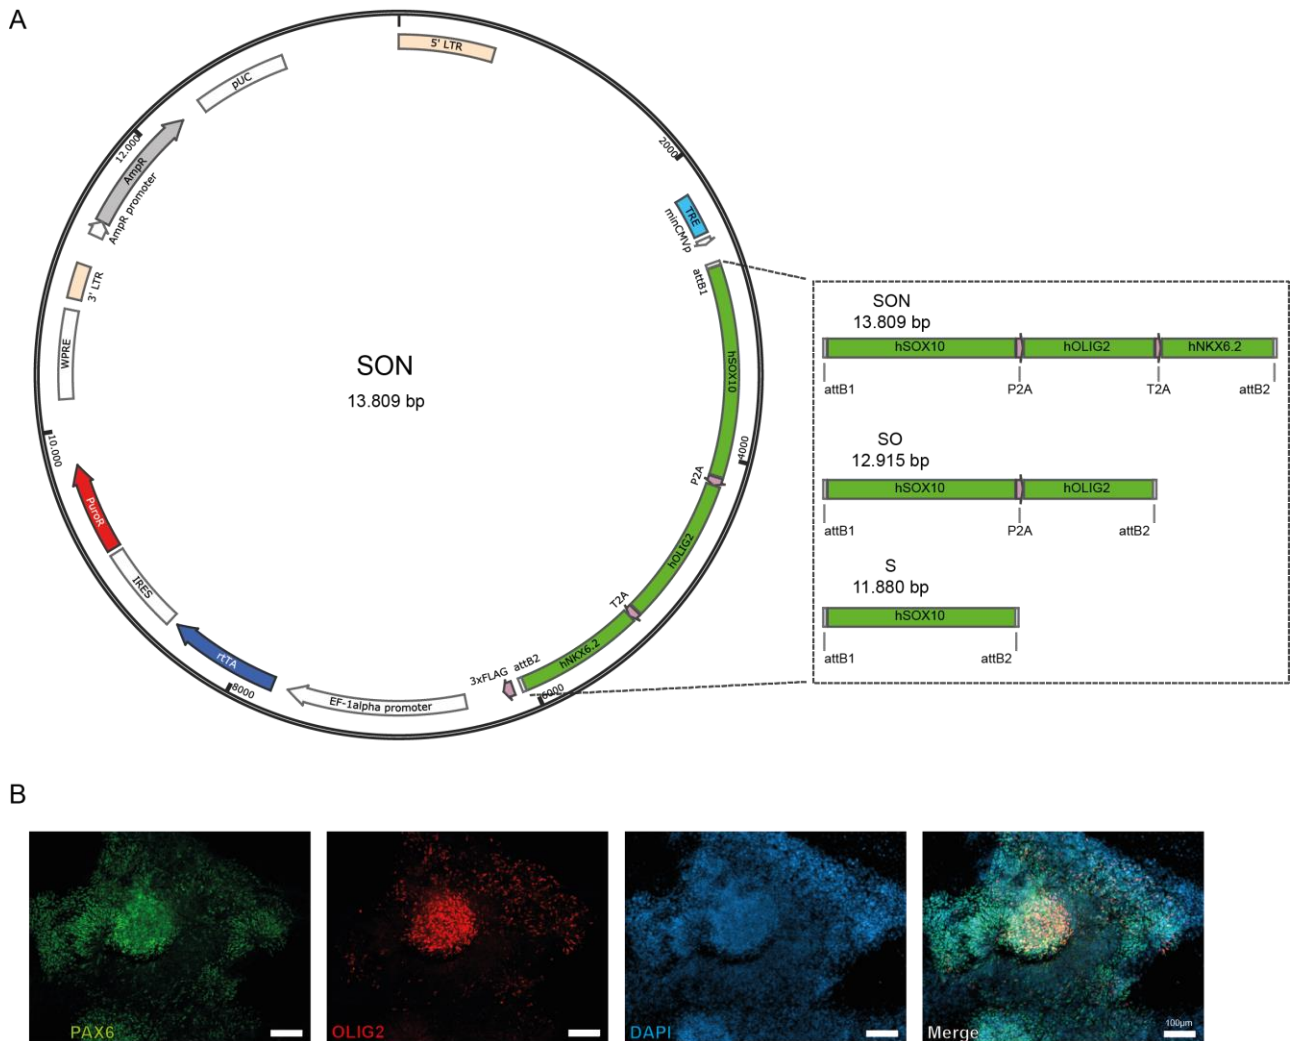

**Figure S1. Detailed illustration of applied lentiviral construct and neural induction. Related to Figure 1.**

- (A) Schematic overview of the applied lentiviral vector containing constitutive expression units for the reversed tetracycline transactivator (rtTA) and puromycin N-acetyl-transferase (PuroR) and a tetracycline response element (TRE) for the doxycycline-dependent overexpression of the TFs. Magnification illustrates the different TFs combinations using SON, SO and S that are linked by the self-cleavage sites P2A and T2A. Plasmid maps of the constructs (S, SO, SON) are available in the supplemental files.
- (B) Representative images of PAX6<sup>+</sup> (green), OLIG2<sup>+</sup> (red) neural precursor cells (NPC) 12 days after neural induction. Scale bar: 100µm.

A

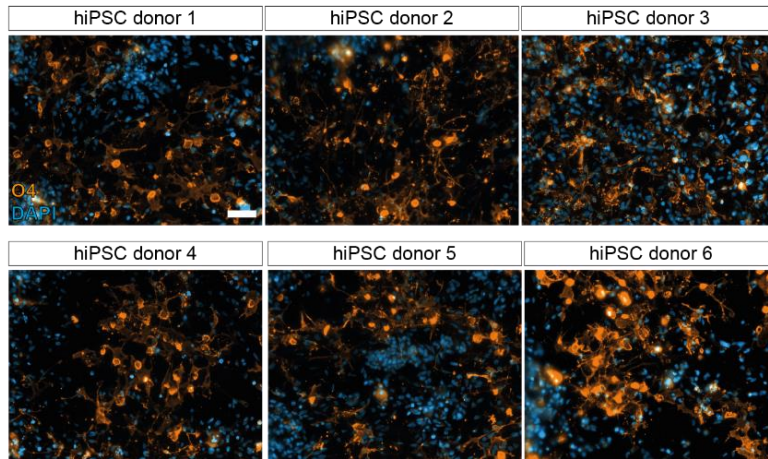

B

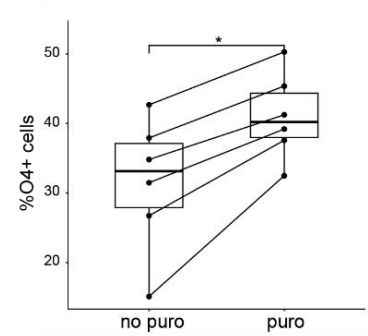

**Figure S2. SON-directed differentiation from different hiPSC lines and effect of intermediate selection. Related to Figure 2.**

- (A) Illustration of O4<sup>+</sup> cells (orange) from six different hiPSC lines of independent donors 10days of SON-directed differentiation with intermediate puromycin selection (puro). Scale bar: 50μm.
- (B) Quantification of O4<sup>+</sup> cells after 10 days of SON-directed differentiation with and without intermediate puromycin selection between Day+2 and Day+4. 13 analysed fields of view for each condition, Dots correspond to mean percentage of O4<sup>+</sup> cells per condition. Lines connects both conditions from one hiPSC cell line. Statistical analysis by Wilcoxon signed-rank test, \*p < 0.05.

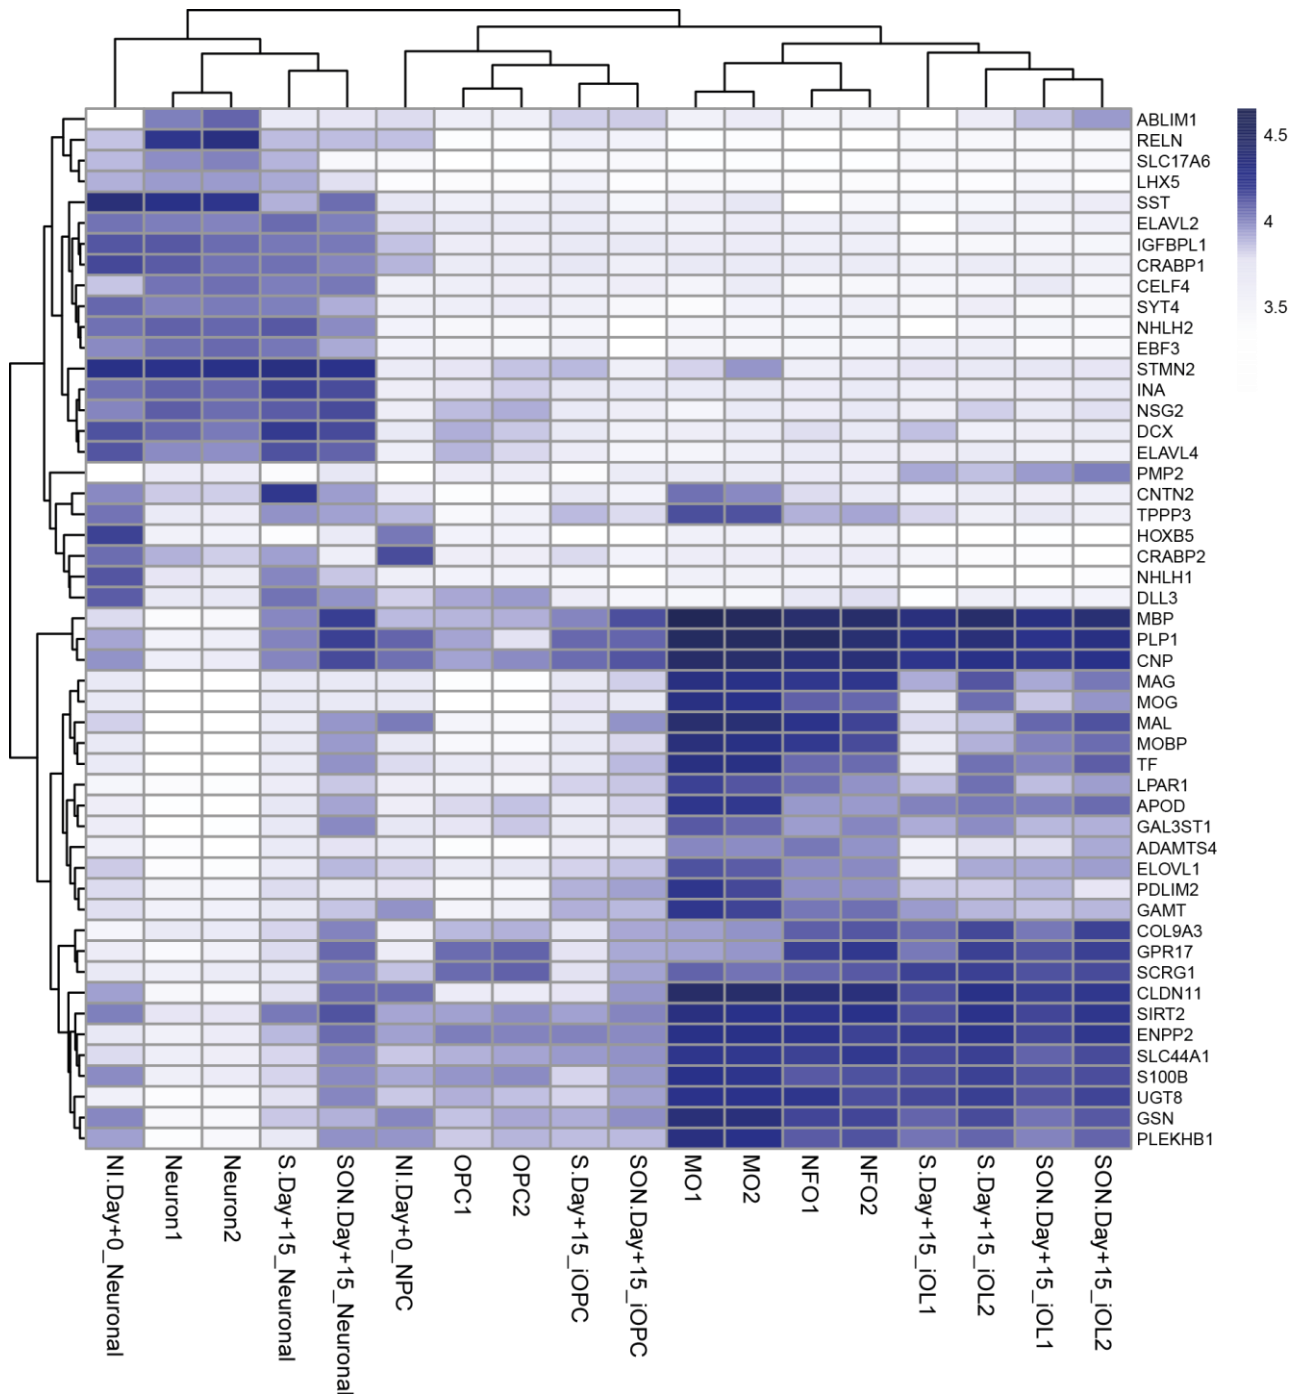

**Figure S3. 50 most variable genes from co-clustering of iOPCs and iOLs with primary cells. Related to Figure 3.**

Comparison of transcriptomes of hiPSC-derived cells with primary murine cells (Zhang et al., 2014). Expression heatmap of the 50 most variable genes in the analysis. Unsupervised hierarchical clustering based on Manhattan distances was performed on samples and genes and used for sorting of the heatmap. Abbreviations for primary reference samples: MO, myelinating oligodendrocytes; NFO, newly formed oligodendrocytes; OPC, oligodendrocyte precursor cells.

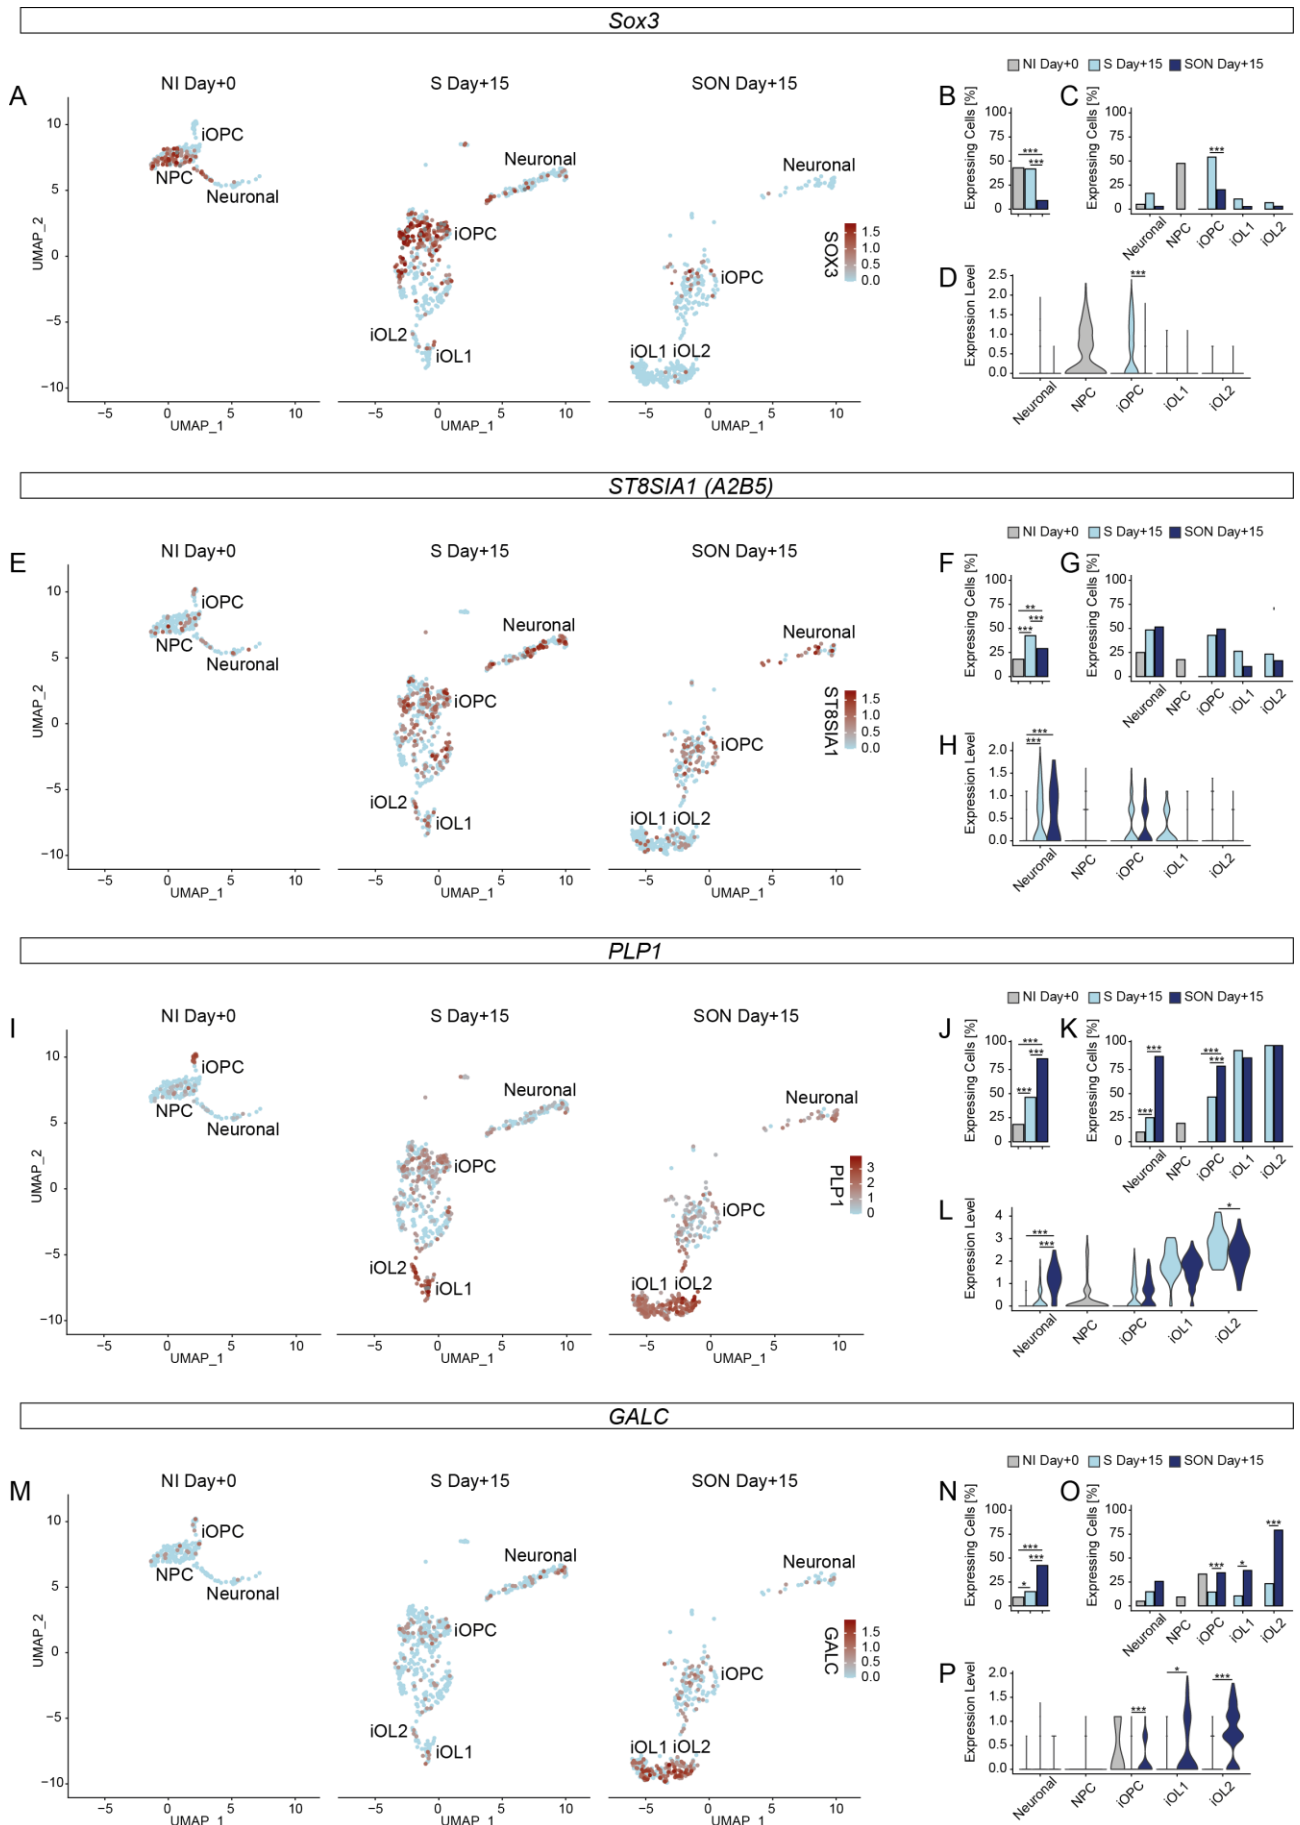

**Figure S4. Illustration of extended marker gene expression from scRNAseq. Related to Figure 4.**

(**A, E, I, M**) UMAP representation of selected marker genes (**A**) *SOX3*, (**E**) *ST8SIA1* (also known as A2B5), (**I**) *PLP1*, (**M**) *GALC* from scRNAseq of baseline sample after neural induction (NI Day+0, n = 217 cells, one independent experiment) and samples after 15 days of directed differentiation by SOX10 (S Day+15, n = 577 cells, one independent experiment) and SOX10-OLIG2-NKX6.2 (SON Day+15, n = 400 cells, one independent experiment) with annotated cell clusters of neural precursor cells (NPC), neuronal cells, induced oligodendrocyte precursor cells (iOPCs), induced oligodendrocyte cluster 1 (iOL1) and induced oligodendrocyte cluster 2 (iOL2). Expression value per cell plotted according to the colour intensity of the respective scale bar as indicated.

(**B, F, J, N**) Bar plots illustrate the abundance of expressing cells for each sample. \* (p-value < 0.05), \*\* (p-value < 0.01), \*\*\* (p-value < 0.001) based on Fisher's exact tests (details provided in Table S5).

(**C, G, K, O**) Bar plots illustrate the abundance of expressing cells for each cluster split by sample. \* (p-value < 0.05), \*\* (p-value < 0.01), \*\*\* (p-value < 0.001) based on Fisher's exact tests (details provided in Table S5).

(**D, H, L, P**) Violin plots of the normalized expression per sample within the respective cell type cluster. \* (p-value < 0.05), \*\* (p-value < 0.01), \*\*\* (p-value < 0.001) based on Wilcoxon signed-rank test (details provided in Table S7).

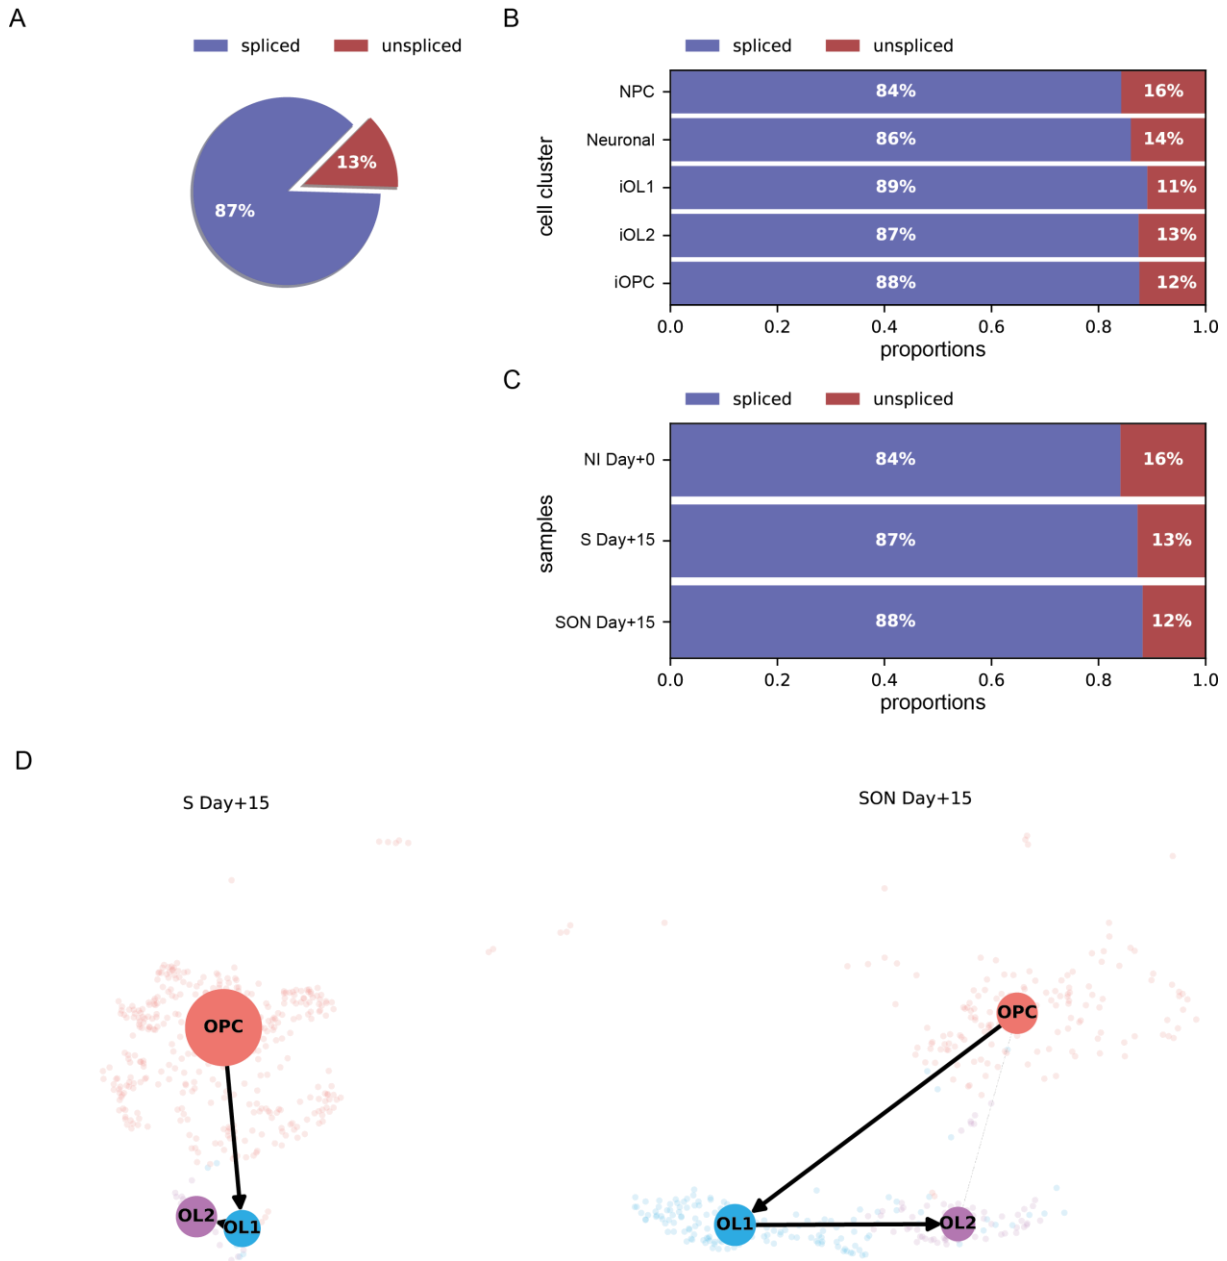

**Figure S5. Ratio of unspliced/spliced mRNA variants and sample-independent main differentiation trajectory analysis. Related to Figure 5.**

- (A) Overall ratio of spliced vs. unspliced mRNA
- (B) Cluster-dependent ratio of spliced vs. unspliced mRNA
- (C) Sample-dependent ratio of spliced vs. unspliced mRNA
- (D) Sample independent main differentiation trajectory analysis using Partition-based graph abstraction (PAGA) to illustrate cluster-to-cluster transitions within the S- and SON-promoted oligodendroglial differentiation.

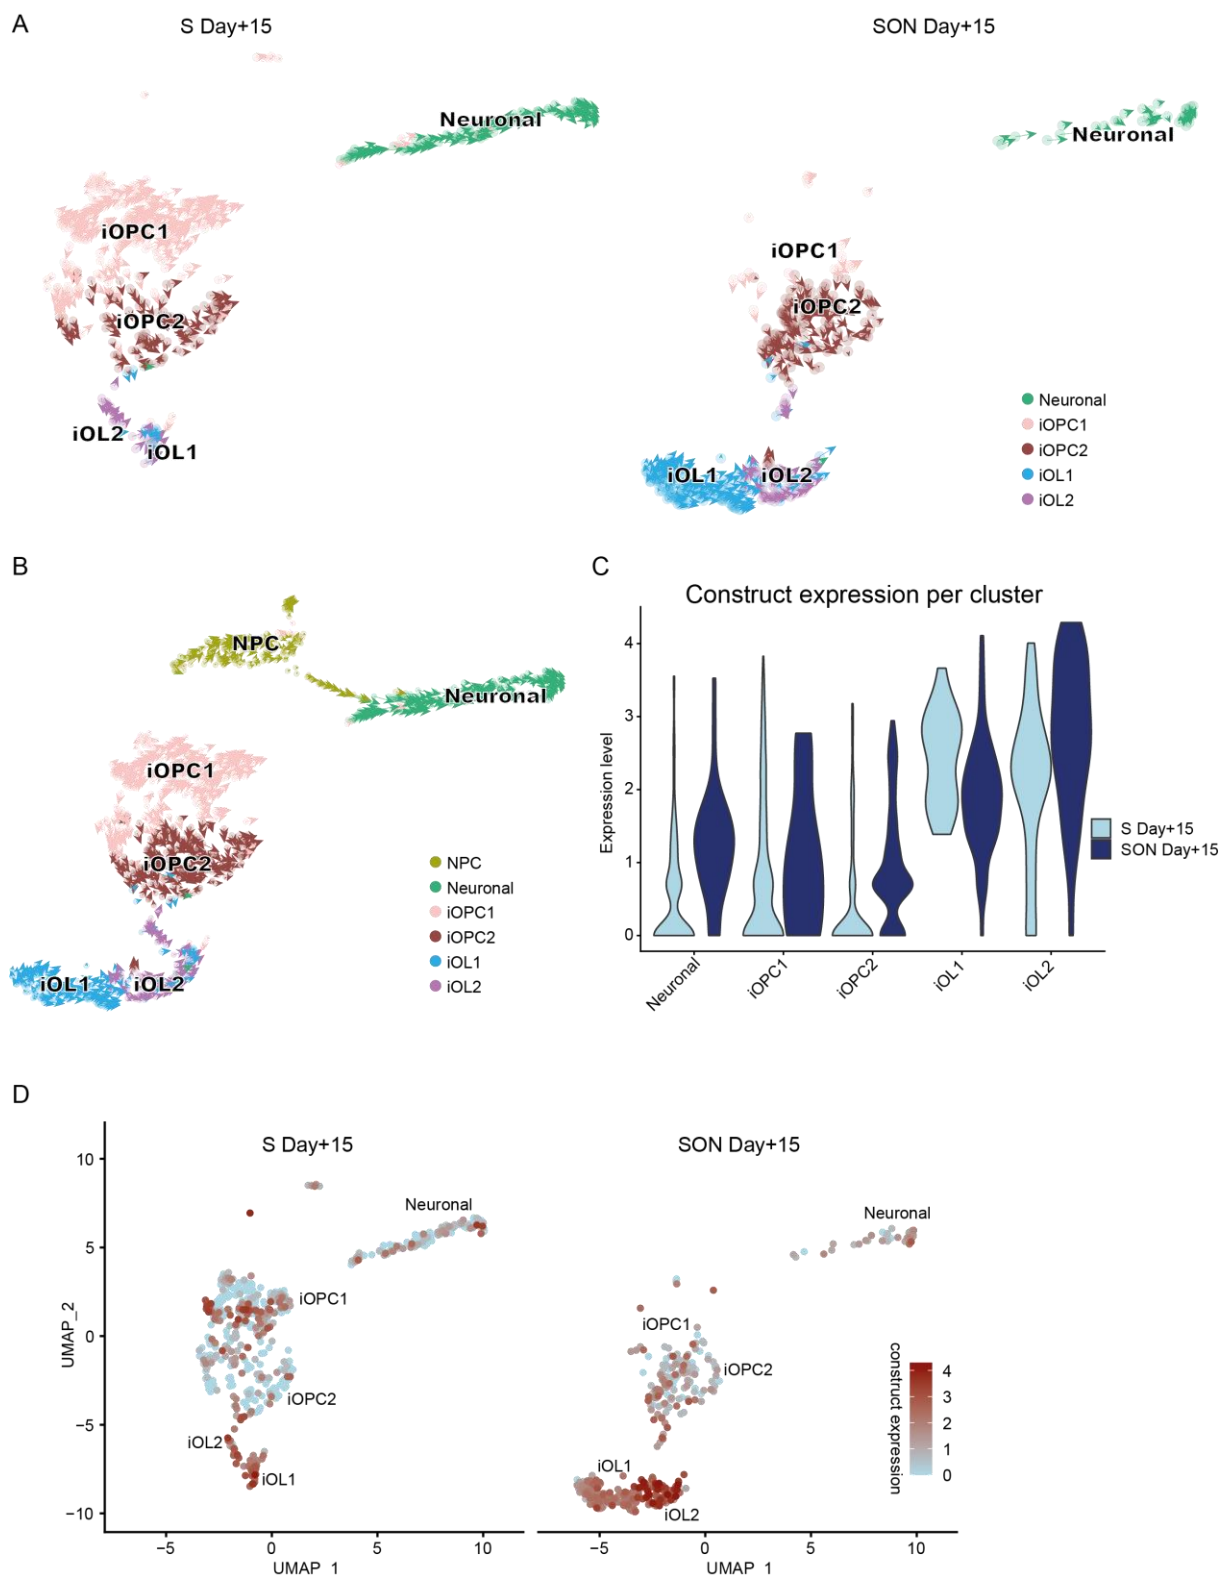

**Figure S6. Differences of RNAvelocity between iOPC1 and iOPC2 are not based on different expression of directing TFs. Related to Figure 6.**

- (A) RNA velocity vectors projected on the single-cell UMAP-based dimension plot, indicating direction and speed of individual cells, including iOPC1 and iOPC2, in transcriptional space.
- (B) Pooled Illustration of scVelocity of NI-, S- and SON-derived samples (NI Day+0, S Day+15, SON Day +15) including iOPC1 and iOPC2.
- (C) Violin plots of normalized construct expression in Neuronal, iOPC1, iOPC2, iOL1 and iOL2 clusters split by S- and SON-sample (S Day+15, SON Day +15).



(D) Illustration of lentiviral construct expression from scRNAseq with UMAP dimension plot for S Day+15 and SON Day+15 with the normalized expression level indicated by colour. Related to Figure S6C.

**Table S1. hiPSC lines in this study.**

| hiPSC cell line | ID LMU       | Donor age | Donor sex | Passage |
|-----------------|--------------|-----------|-----------|---------|
| hiPSC donor 0   | PSYLMUi001-A | 27        | male      | P17     |
| hiPSC donor 1   | PSYLMUi002-A | 24        | male      | P18     |
| hiPSC donor 2   | PSYLMUi003-A | 19        | male      | P17     |
| hiPSC donor 3   | PSYLMUi004-A | 31        | male      | P18     |
| hiPSC donor 4   | PSYLMUi006-A | 52        | male      | P21     |
| hiPSC donor 5   | PSYLMUi023-A | 47        | male      | P19     |
| hiPSC donor 6   | PSYLMUi027-A | 53        | male      | P15     |

**Table S2. Media, media supplements for cell cultivation and coating.**

| Item                                      | Supplier               | Cat.No.     |
|-------------------------------------------|------------------------|-------------|
| iPS-Brew                                  | Miltenyi Biotec        | 130-104-368 |
| mTeSR1                                    | Stem Cell              | 85850       |
| ProFreeze CDM                             | Lonza                  | BEBP12-769E |
| DMEM/F-12 with GlutaMAX™ supplement       | ThermoFisherScientific | 31331028    |
| N-2 Supplement (100x)                     | ThermoFisherScientific | 17502048    |
| B-27® Supplement (50X), without vitamin A | ThermoFisherScientific | 12587010    |
| Non-Essential Amino Acids Solution (NEAA) | ThermoFisherScientific | 11140035    |
| β-Mercaptoethanol                         | ThermoFisherScientific | 21985023    |
| Insulin solution human                    | Sigma                  | I9278-5ML   |
| SB431542                                  | StemCell               | 72232       |
| LDN193189 (HCl) - superstock              | StemCell               | 72147       |
| Retinoic acid (RA)                        | Sigma                  | R2625-50MG  |
| SAG                                       | Millipore              | 566660      |
| PDGFaa                                    | PeproTech              | 100-13A     |
| IGF1                                      | PeproTech              | 100-11      |
| HGF                                       | PeproTech              | 100-39      |
| NT3                                       | Peprtech               | AF-450-03   |
| Biotin                                    | Sigma                  | B4639-100MG |
| dbcAMP                                    | Sigma                  | D0627-250MG |
| T3                                        | Sigma                  | T6397-100MG |
| Doxycycline                               | Clontech               | NC0424034   |
| Puromycin                                 | ThermoFisherScientific | A1113803    |
| ROCK-Inhibitor (Y-27632)                  | Selleckchem            | S 1049      |
| RevitaCell                                | ThermoFisherScientific | A2644501    |
| Vitronectin                               | ThermoFisherScientific | A14700      |
| Matrigel                                  | BD Bioscience          | 354277      |
| Poly-L-ornithine solution                 | Sigma                  | P4957       |
| Laminin (mouse)                           | Sigma                  | T6397-100MG |
| EDTA                                      | ThermoFisherScientific | 15575-020   |
| Accutase                                  | Sigma                  | A6964       |
| Anti-O4 microbeads                        | Miltenyi Biotec        | 130-096-670 |

**Table S3. List of primary antibodies for immunostainings.** Related to Figure 1, 2, 6, S1, S2.

| Antigen | Dilution | Supplier    | Cat.No. | Serotype        | Host    |
|---------|----------|-------------|---------|-----------------|---------|
| O4      | 1:200    | R&D Systems | MAB1326 | IgM, monoclonal | mouse   |
| MBP     | 1:50     | Millipore   | AB9348  | IgG, polyclonal | chicken |
| MBP     | 1:200    | Abcam       | ab40390 | IgG, polyclonal | rat     |

|              |       |            |           |                 |        |
|--------------|-------|------------|-----------|-----------------|--------|
| Pax 6        | 1:500 | Millipore  | AB2237    | IgG, polyclonal | rabbit |
| Olig2 (H-10) | 1:100 | Santa Cruz | sc-515947 | IgG, monoclonal | mouse  |
| Flag-M2      | 1:100 | Sigma      | 3165      | IgG, monoclonal | mouse  |

**Table S4: Abundance of cell clusters, gene marker expressing cells per samples and cluster.** Provided separately as Excel file. Related to Figure 3, 4 and S4. Provided separately as Excel file.

**Table S5: Statistical analysis of cell clusters abundance per sample, abundance of gene expressing cells by sample and abundance of gene expressing cells per cluster split by sample.** Related to Figure 3, 4 and S4. Provided separately as Excel file.

**Table S6: Average expression of cell clusters.** Related to Figure 3, 4 and S4. Provided separately as Excel file.

**Table S7: Statistical analysis of normalized gene expression by cell cluster and by cell cluster split by sample.** Related to Figure 3, 4 and S4. Provided separately as Excel file.

**Table S8: Differential gene expression between iOPC1 and iOPC2.** Related to Figure 6. Provided separately as Excel file.

**Table S9: Hypergeometric gene ontology term enrichment analysis of iOPC1 and iOPC2.** Related to Figure 6. Provided separately as Excel file.

## Supplemental References

Zhang, Y., Chen, K., Sloan, S.A., Bennett, M.L., Scholze, A.R., O'Keeffe, S., Phatnani, H.P., Guarnieri, P., Caneda, C., Ruderisch, N., et al. (2014). An RNA-sequencing transcriptome and splicing database of glia, neurons, and vascular cells of the cerebral cortex. *J. Neurosci. Off. J. Soc. Neurosci.* **34**, 11929–11947.
